# Supplementary material
Source: Springer Nature journal article supplement (https://www.springermedizin.de/resource/supplementary/12881_2009_622_MOESM8_ESM.pdf/9451084)

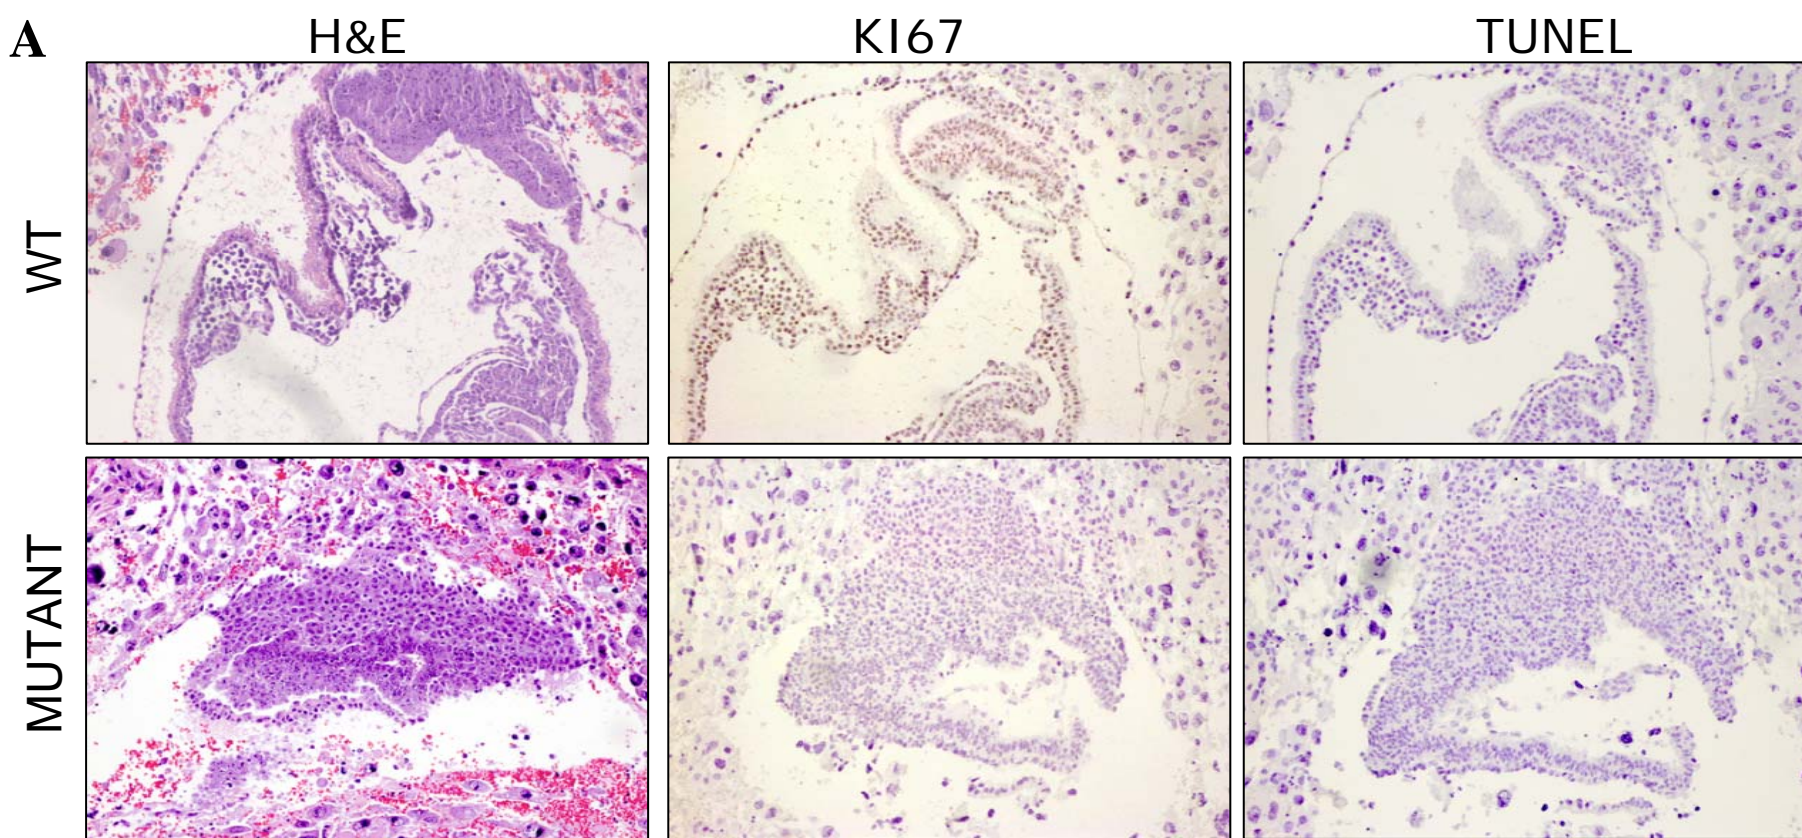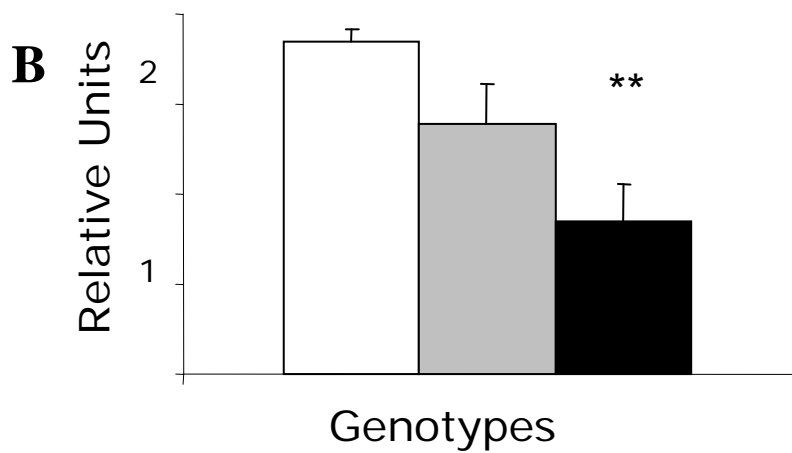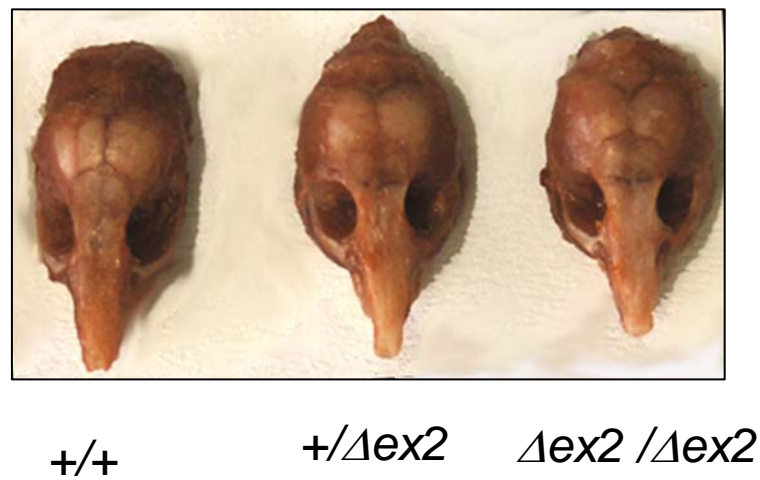

Supplement: MOESM8 [file 9451084]
